# Supplementary material
Source: PubMed Central journal article supplement (PMC3138316)
Supplement: supp_M110.186049_jbc.M110.186049-1.pdf [file supp_M110.186049_jbc.M110.186049-1.pdf]

## SUPPLEMENTARY INFORMATION

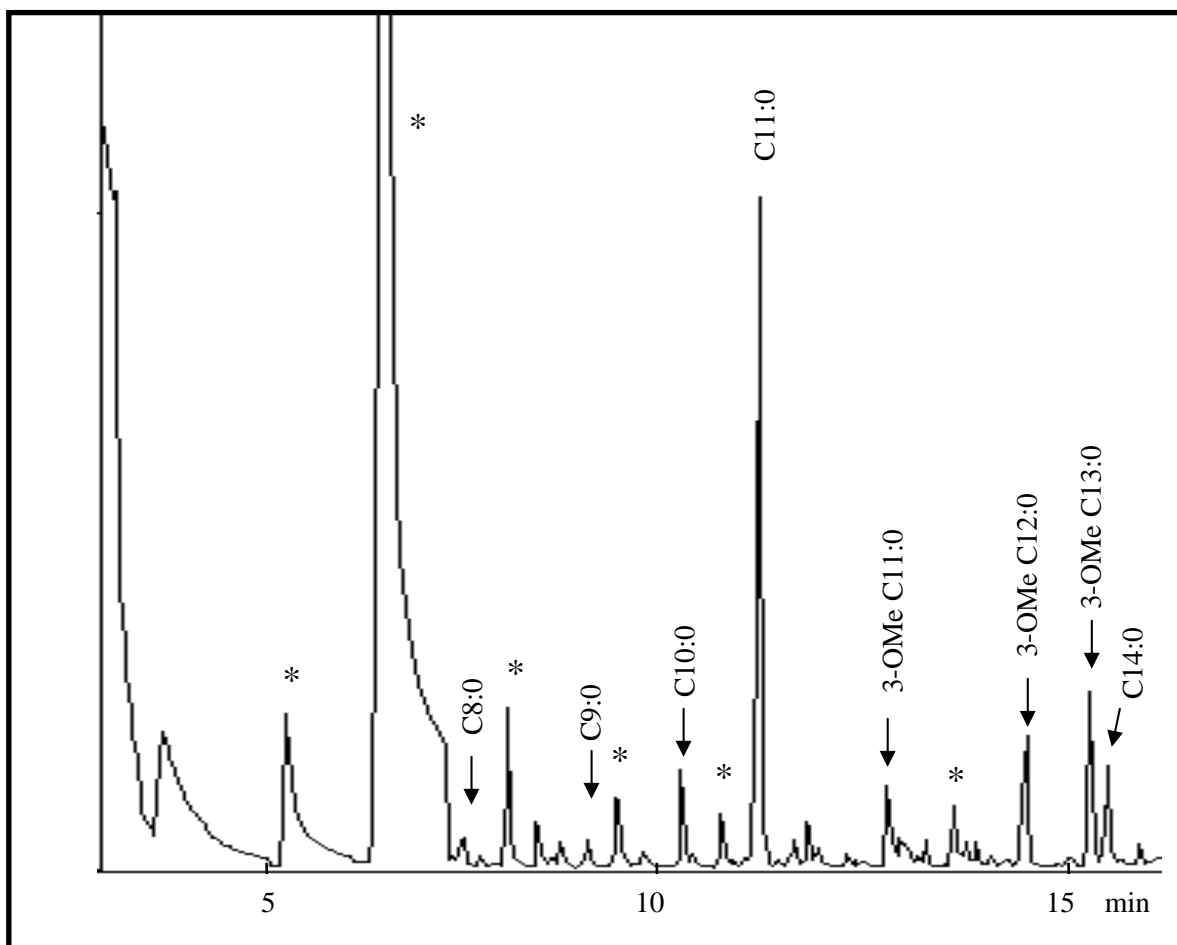

**Figure S1: Gas liquid chromatography of the fatty acids obtained from Xac wild type lipid A.** Fatty acids were released from lipid A by hydrolysis with 4N NaOH (100 °C, 5h), neutralization and extraction with  $\text{CHCl}_3$ . Products were dissolved in anhydrous MeOH and treated with methanolic 0,5 M PTMAH. Analysis was performed on a capillary column (Ultra-1, 25 m x 0.20 mm). The temperature programme was 80 °C for 2 min, then rose to 290 °C, rate 10 °C/min, final time 30 min. Injector temperature: 260 °C for *in situ* pyrolytic derivatization.

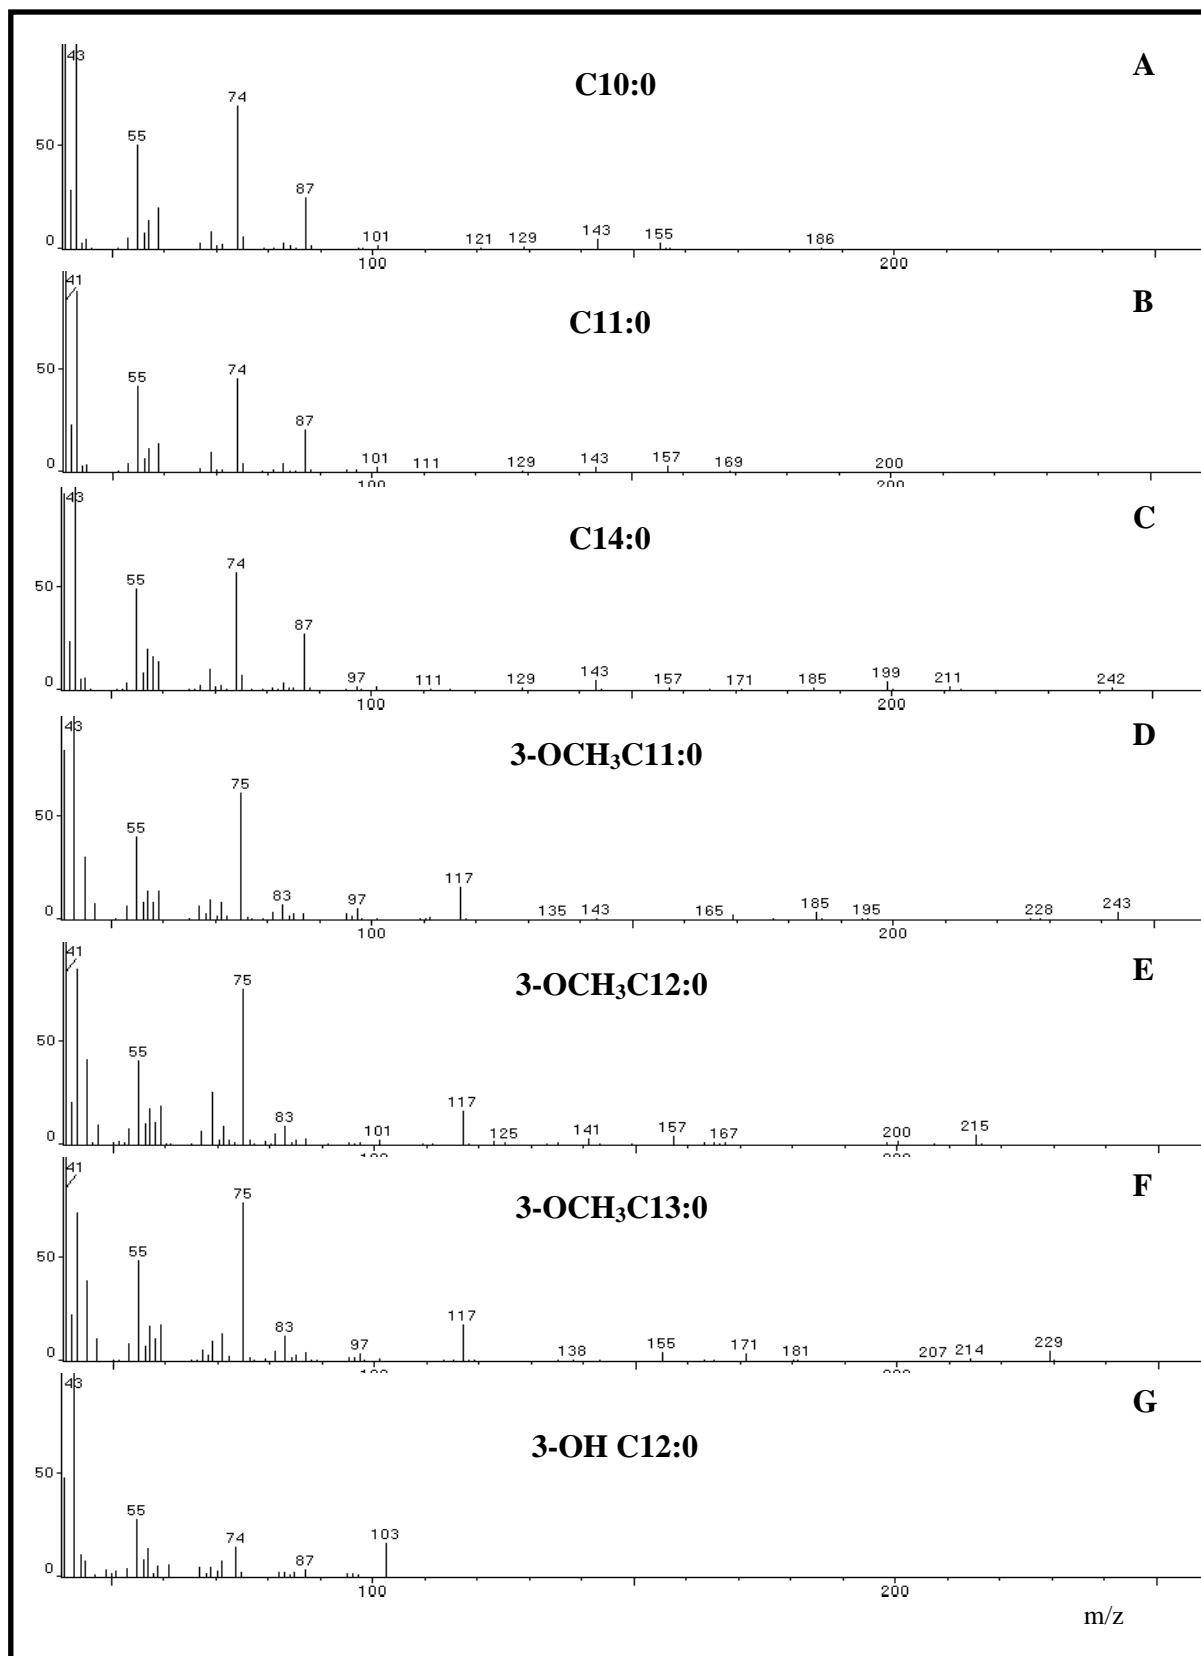

**Figure S2: Mass spectra of the methylated fatty acids obtained from lipid A released from Xac wild type LPS.**

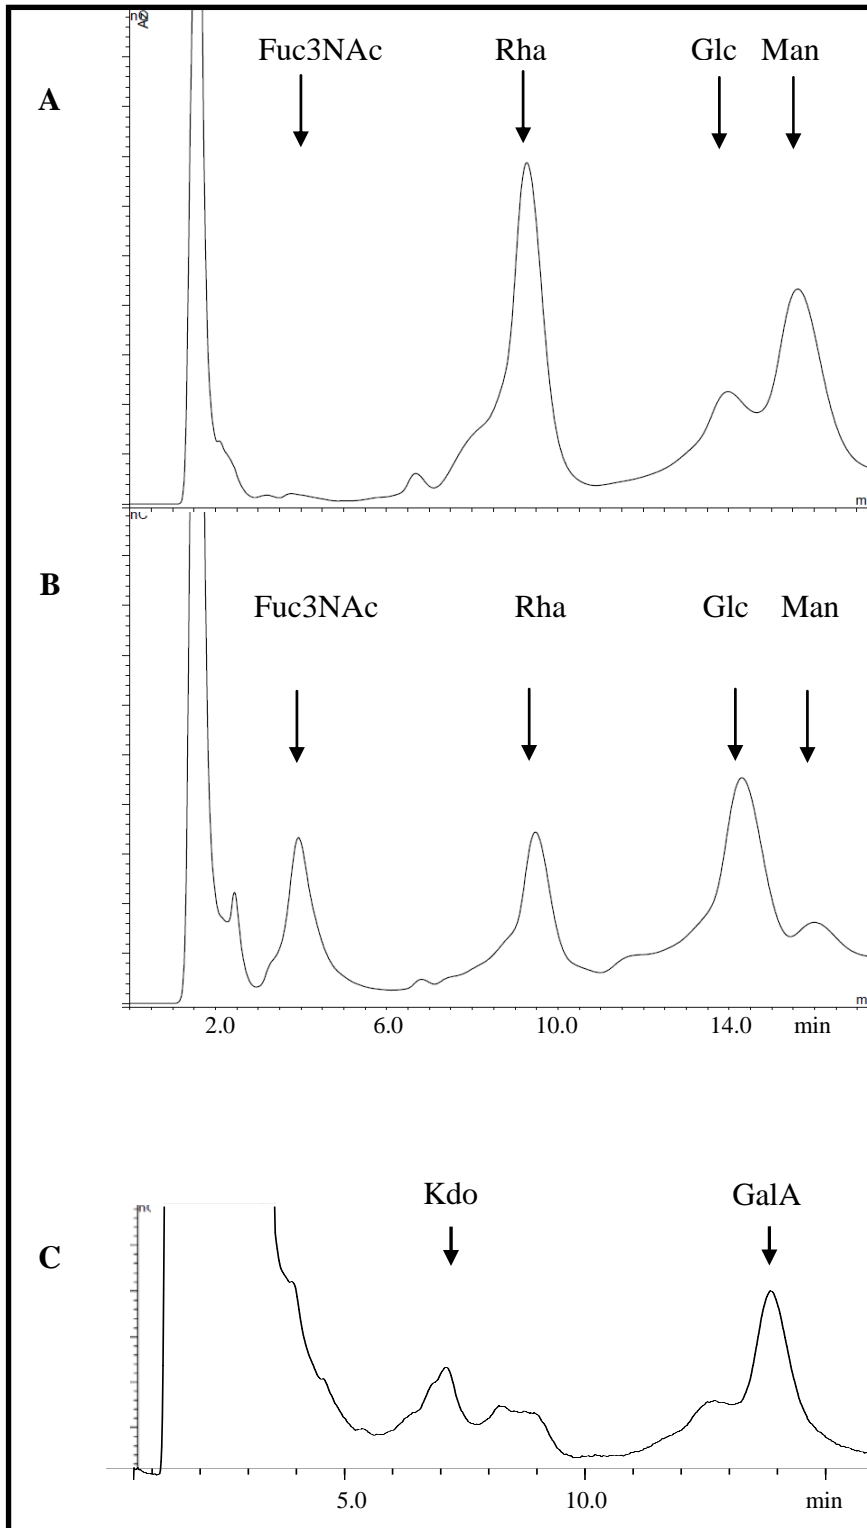

**Figure S3: Monosaccharide composition analysis of purified oligosaccharides by HPAEC.** The neutral monosaccharide components released from the *Xac* wild type (A) and *Xacwzt* (B) oligosaccharides and acidic components release from *Xac* wild type oligosaccharide (C). Analytical HPAEC was carried on a Carboapak PA-10 column (4 x 250 mm, Dionex) using the eluents: 16 mM NaOH for (A) and (B); 50 mM NaOH/100 mM NaAcO for (C). The run was monitored by pulse amperometric detection.

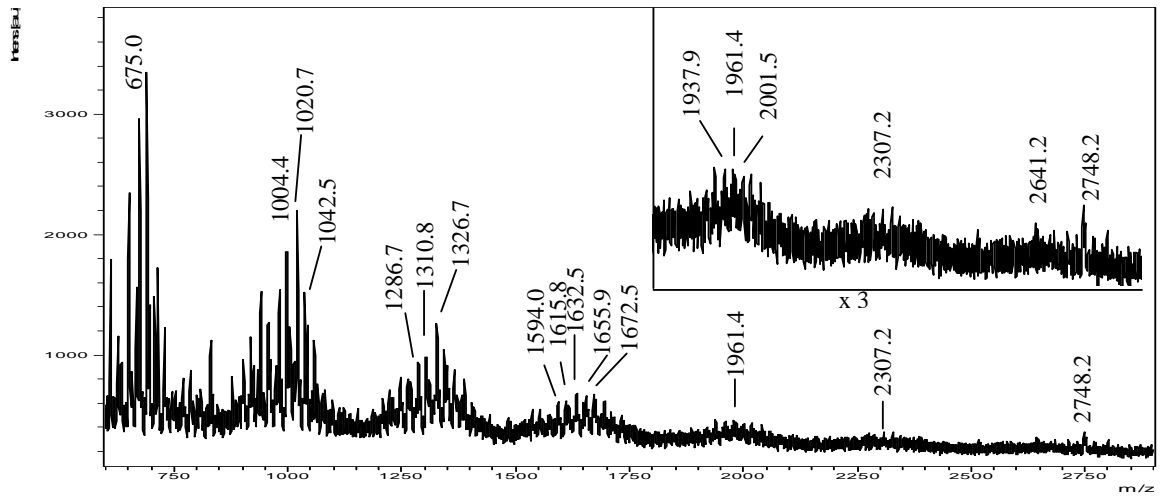

**Figure S4: MALDI-TOF MS analysis of the released oligosaccharide obtained from Xac wild type LPS analyzed in the negative ion mode.**

**Table S1: Primers of *Citrus sinensis* cv. Valencia late used in the RT-PCR assay.**

| <b>Primer name</b> | <b>Sequence</b>                  | <b>Amplified fragment</b> |
|--------------------|----------------------------------|---------------------------|
| PR-1F              | 5' AAAGTTGTTCAAACCTTTTTGTCCTT 3' | 252 pb                    |
| PR-1R              | 5' ACATGATCAATAGTAGGGATGTTAGC 3' |                           |
| PALF               | 5' CTTGAATTATCCATAGAGACACCAAT 3' | 280 pb                    |
| PALR               | 5' ATAATGGAACATATCTTGGATGGTAG 3' |                           |
| MKK4F              | 5' GGCACCCTCGATACTTTGTT 3'       | 293 pb                    |
| MKK4R              | 5' TAATTCCCTCCGTAGGCATC 3'       |                           |
| actF               | 5' CAGCCATCTCTCATCGGAAT 3'       | 329 pb                    |
| actR               | 5' CCTGTGGACAATGGATGGAC 3'       |                           |
